# Supplementary material for: No evidence for DNA N6-methyladenine in mammals
Source: PubMed Central journal article supplement — Sci Adv. 2020 Mar 18;6(12):eaay3335. doi: 10.1126/sciadv.aay3335 (PMC7080441; doi:10.1126/sciadv.aay3335), 2020-03-18
Supplement: aay3335_SM.pdf [file aay3335_SM.pdf]

## Supplementary Materials for

### No evidence for DNA $N^6$ -methyladenine in mammals

Karolos Douvlataniotis, Maïke Bensberg, Antonio Lentini, Björn Gylemo, Colm E. Nestor\*

\*Corresponding author. Email: [colm.nestor@liu.se](mailto:colm.nestor@liu.se)

Published 18 March 2020, *Sci. Adv.* **6**, eaay3335 (2020)

DOI: [10.1126/sciadv.aay3335](https://doi.org/10.1126/sciadv.aay3335)

#### The PDF file includes:

Fig. S1. Antibody detection of 6mdA in mammals is flawed.

Fig. S2. Extended analysis of repetitive elements and mappability for 6mdA DIP-seq.

Fig. S3. Extended analysis of 6mdA DIP-seq read splicing and genic location.

Table S1. SMRT-seq read coverage in studies of 6mdA in mammalian DNA.

Table S2. Primers used to detect *Mycoplasma* species.

Legends for data S1 and S2

#### Other Supplementary Material for this manuscript includes the following:

(available at [advances.sciencemag.org/cgi/content/full/6/12/eaay3335/DC1](https://advances.sciencemag.org/cgi/content/full/6/12/eaay3335/DC1))

Data S1 (Microsoft Excel format). Summary of analyzed datasets and their relationship to figures.

Data S2 (Microsoft Excel format). Summary of amplicons used in dot blots.

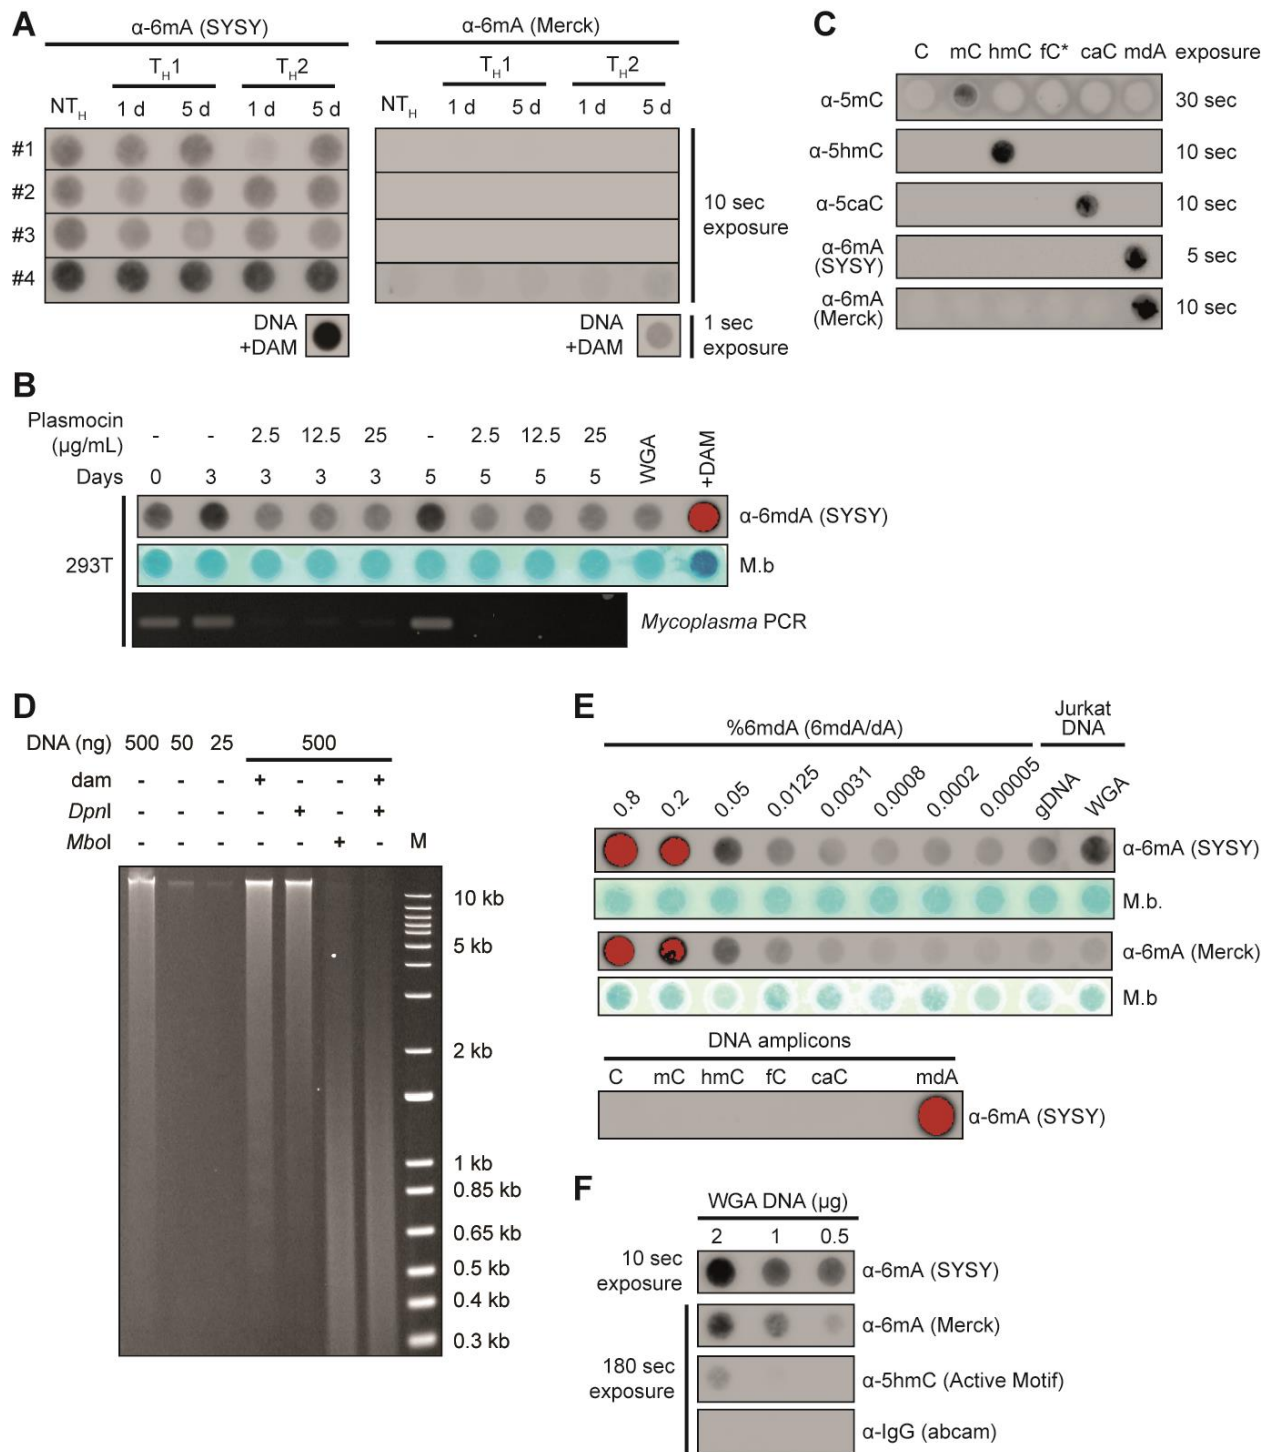

**Fig. S1. Antibody detection of 6mdA in mammals is flawed.** (A) Immuno-dot blot showing relative 6mdA abundance in human CD4<sup>+</sup> T-cells during *in vitro* differentiation, for n = 4 biological replicates and n = 2 independent 6mdA antibodies. (B) Immuno-dot blot and mycoplasma contamination status showing loss of 6mdA signal upon antibiotic based removal of *Mycoplasma spp.* contamination from cultured 293T cells, n = 1. +DAM, Human CD4<sup>+</sup> T-cell DNA treated with bacterial deoxyadenosine methylase (DAM). (C) Immuno-dot blot showing

specificity of 6mdA antibodies. 10 ng DNA was loaded in each well. \* $\alpha$ -fC antibody was not tested. **(D)** Generation of DAM methylated Jurkat cell genomic DNA. *dam*, DNA methyltransferase modifies the adenine residue (N6) in the sequence 5'-GATC-3'. *DpnI*, only cleaves the sequence 5'-GATC-3' when methylated. *MboI* only cleaves the sequence 5'-GATC-3' when not methylated. **(E)** Immuno-dot blot showing relative sensitivity of two 6mdA antibodies. As controls 10 ng of polynucleotide dsDNA fragments (Suppl. Data 2) equivalent to 16 fmol of the modification were loaded onto the dot blot and incubated with antibody against 6mA (SYSY). **(F)** Immuno-dot blot of whole genome amplified Jurkat cell DNA with antibodies specific for 6mdA, 5hmC and a non-specific IgG antibody. (B, E, F) WGA, whole genome amplified CD4+ T-cell DNA.

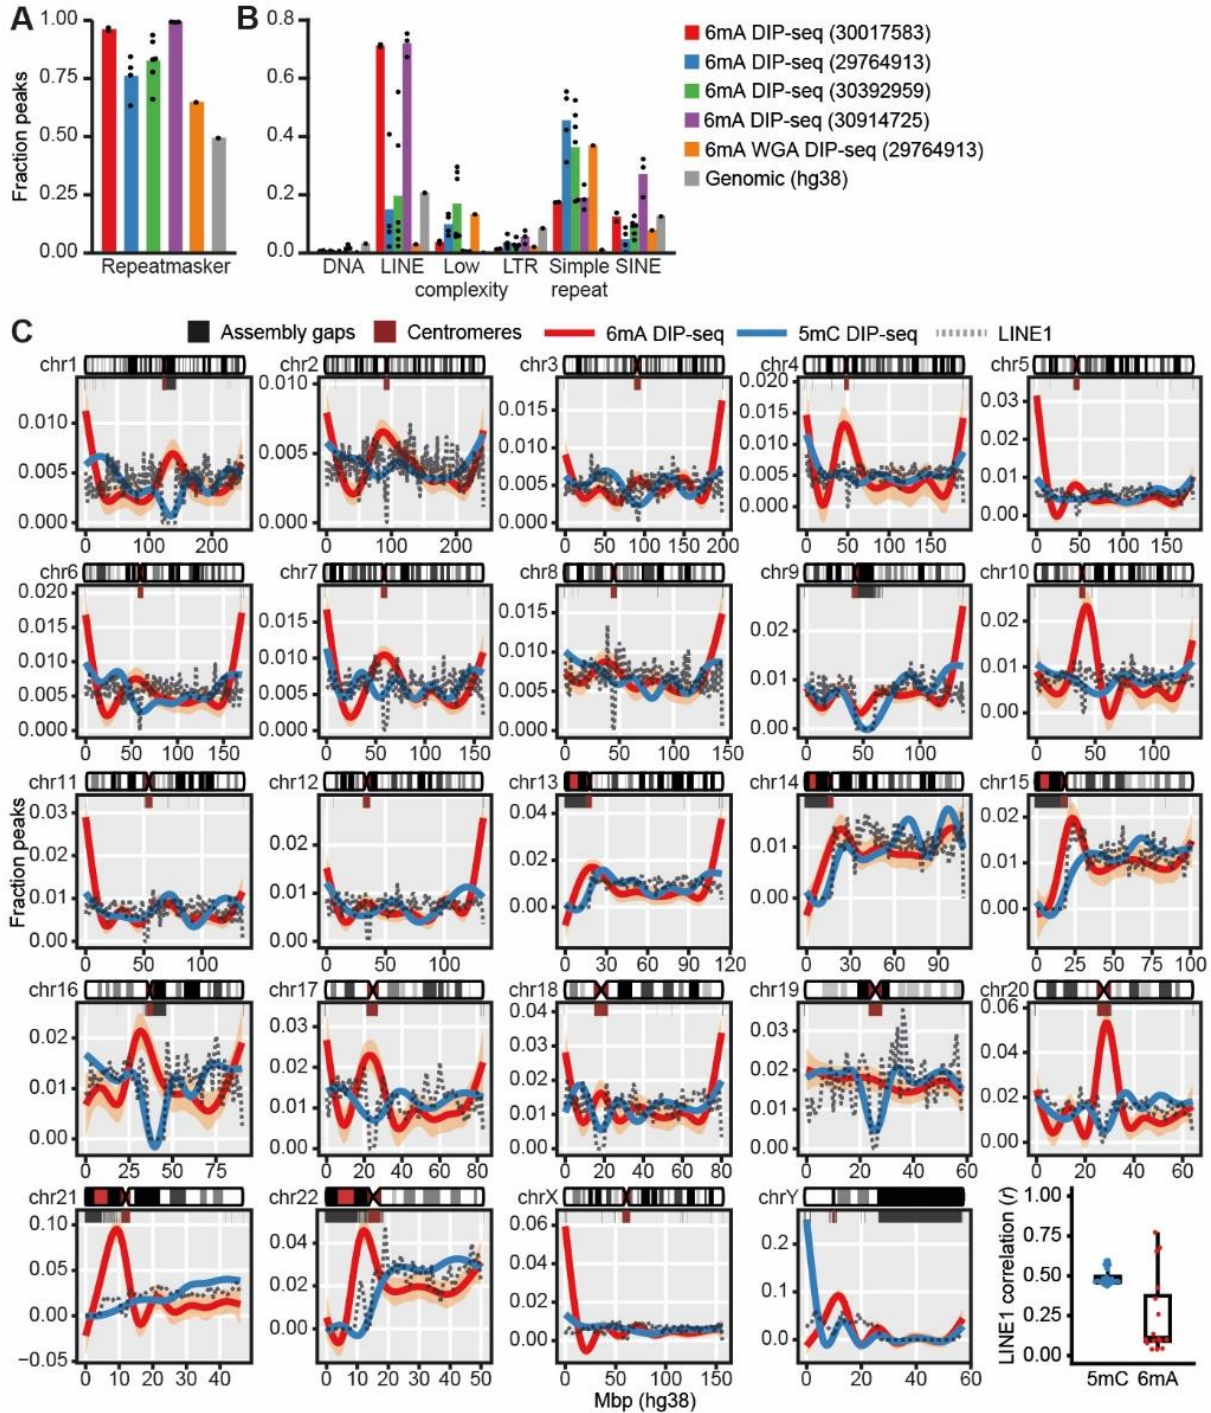

**Fig. S2. Extended analysis of repetitive elements and mappability for 6mdA DIP-seq.** (A) Fraction of enriched DIP-seq peaks located in all Repeatmasker repetitive elements or (B) classes for 6mA ( $n = 16$ ) from multiple studies ( $n = 4$ ) and expected genomic fractions from hg38. (C) Fraction of enriched DIP-seq peaks per Mbp along hg38 chromosomes for 6mA ( $n = 16$ ) or 5mC ( $n = 45$ ). Bottom right panel indicates the genome-wide correlation with LINE1 elements measured by Pearson correlation per sample. Location of LINE1 elements and assembly gaps obtained from UCSC Repeatmasker and gap track, respectively.

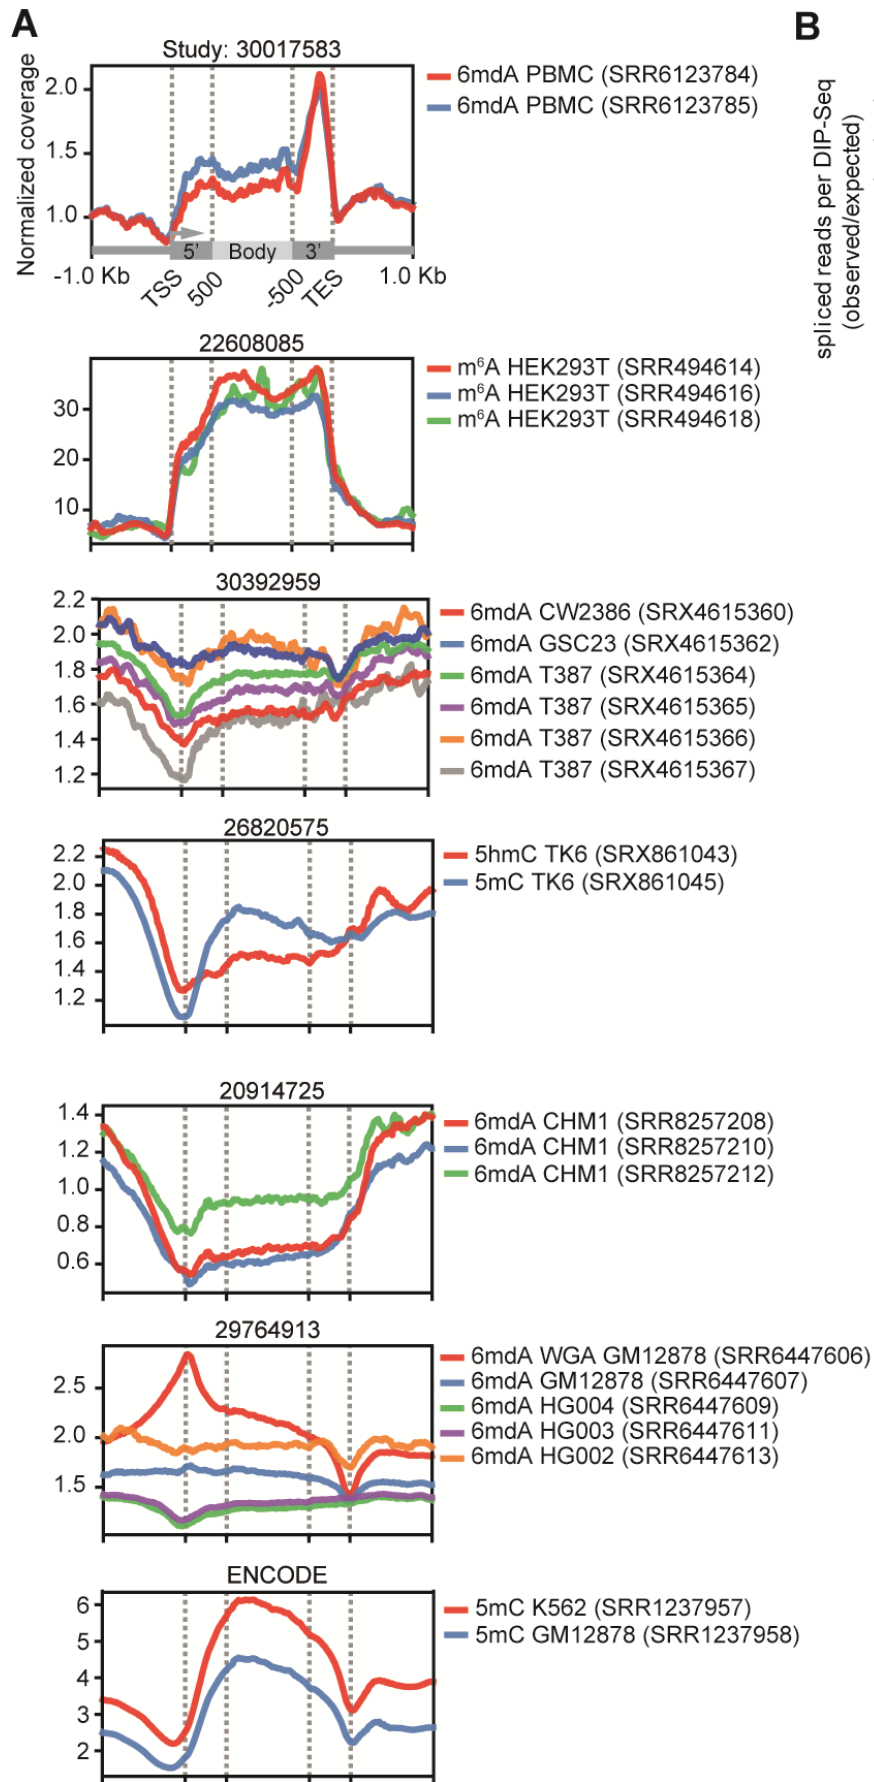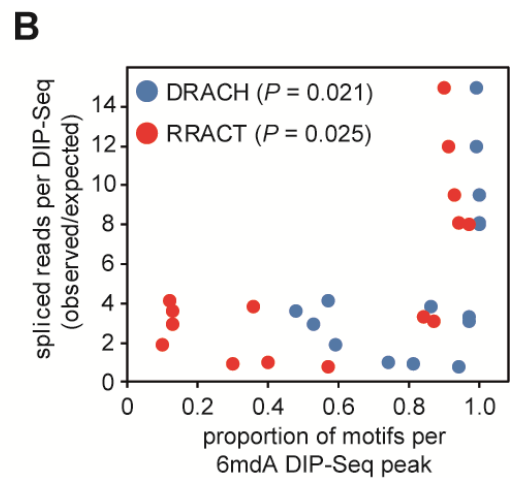

**Fig. S3. Extended analysis of 6mdA DIP-seq read splicing and genic location.** (A) Metagene signal over gene bodies normalized to 1x depth (reads per genome coverage, RPGC) for DIP-seq 6mA (n = 16), 5hmC (n = 1), 5mC (n = 3) and RNA RIP-seq m<sup>6</sup>A (n = 3). 5', 5' UTR; 3', 3' UTR; Body, Gene body; TSS, Transcription start site; TES, transcription end site. (B) Comparison of consensus motif frequency in 6mdA peaks and the proportion of read splicing in 6mdA DIP-seq data sets. P-value of Spearman's correlation (*rho*) is shown.

**Table S1. SMRT-seq read coverage in studies of 6mdA in mammalian DNA.**

| Study         | Species | Sample | Coverage | PMID     |
|---------------|---------|--------|----------|----------|
| Zhu et al.    | Human   | HG002  | 18.2     | 29764913 |
| Zhu et al.    | Human   | HG003  | 17.2     | 29764913 |
| Zhu et al.    | Human   | HG004  | 16.3     | 29764913 |
| Zhu et al.    | Human   | WGA    | 39.4     | 29764913 |
| Wu et al.     | Mouse   | WT     | >30*     | 27027282 |
| Wu et al.     | Mouse   | KO     | >30*     | 27027282 |
| Pacini et al. | Human   | AK1    | 101      | 30914725 |
| Pacini et al. | Human   | CHM1   | 54       | 30914725 |
| Xiao et al.   | Human   | HX1    | 103      | 30017583 |

\*not genome wide

**Table S2. Primers used to detect *Mycoplasma* species. Fw, forward primer, Rv, reverse primer**

| Primer         | Sequence                   | Species                                                                                                                                                                                     | Product size (bp)               |
|----------------|----------------------------|---------------------------------------------------------------------------------------------------------------------------------------------------------------------------------------------|---------------------------------|
| (Fw) Myco 5-1  | CGC CTG AGT AGT ACG TTC GC | <i>M. fermentans</i> ,<br><i>M. bovis</i>                                                                                                                                                   | 518                             |
| (Fw) Myco 5-2  | CGC CTG AGT AGT ACG TAC GC | <i>A. laidlawii</i>                                                                                                                                                                         | 525                             |
| (Fw) Myco 5-2a | TGC CTG AGT AGT ACA TTC GC | <i>M. gallisepticum</i>                                                                                                                                                                     | 504                             |
| (Fw) Myco 5-2b | TGC CTG GGT AGT ACA TTC GC | <i>Ureaplasma spp.</i>                                                                                                                                                                      | 504                             |
| (Fw) Myco 5-5  | CGC CTG GGT AGT ACA TTC GC | <i>M. pirum</i>                                                                                                                                                                             | 504                             |
| (Fw) Myco 5-6  | CGC CTG AGT AGT AGT CTC GC | <i>M. arginini</i> ,<br><i>M. hominis</i> ,<br><i>M. hyorhinitis</i> ,<br><i>M. orale</i> ,<br><i>M. pneumoniae</i>                                                                         | 520<br>522<br>518<br>520<br>517 |
| (Rv) Myco 3-1  | GCG GTG TGT ACA AGA CCC GA | <i>M. arginini</i> ,<br><i>M. bovis</i> ,<br><i>M. fermentans</i> ,<br><i>M. gallisepticum</i> ,<br><i>M. hominis</i> ,<br><i>M. orale</i> ,<br><i>M. pirum</i> ,<br><i>Ureaplasma spp.</i> |                                 |
| (Rv) Myco 3-2  | GCG GTG TGT ACA AAA CCC GA | <i>M. hyorhinitis</i> ,<br><i>M. pneumoniae</i>                                                                                                                                             |                                 |
| (Rv) Myco 3-3  | CGG TGT GTA CAA ACC CCG A  | <i>A. laidlawii</i>                                                                                                                                                                         |                                 |

### Other Supplementary Materials

**Data S1. Summary of analyzed datasets and their relationship to figures.**

**Data S2. Summary of amplicons used in dot blots.**
